# Supplementary material for: Increased aerobic glycolysis is important for the motility of activated VSMC and inhibited by indirubin-3′-monoxime
Source: PubMed Central journal article supplement — Vascul Pharmacol. Author manuscript; Available in PMC 2016 Aug 1. (PMC4939873; doi:10.1016/j.vph.2016.05.002), 2016-05-14

### Supplemental Figures:

**Supplemental Figure 1: PDGF-induced scratch closure within 21 hours is independent of proliferation in VSMC.** Quiescent VSMC were pretreated with mitomycin (10  $\mu$ M) as indicated and then subjected to a scratch assay using PDGF (10 ng/mL) as stimulus. Bar graph depicts compiled data from three independent experiments.

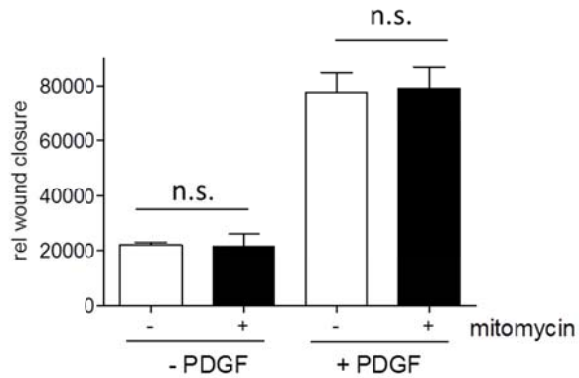

**Supplemental Figure 2: PDGF stimulation does not cause an obvious change in the oxygen consumption rate in VSMC.** Quiescent VSMC were subjected to an analysis of basal oxygen consumption rate by extracellular flux analysis (corrected for protein mass). Bar graph depicts compiled data from three independent experiments.

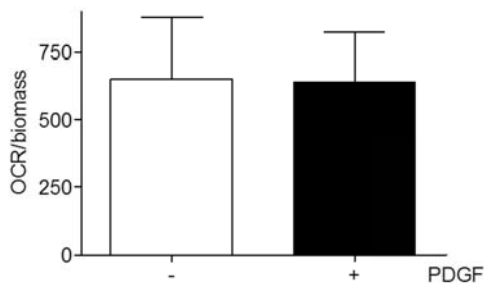

**Supplemental Figure 3: I3MO does not inhibit PDGF-induced Ser727 phosphorylation of STAT3.** Quiescent VSMC were pretreated with 3 and 5  $\mu$ M I3MO for 30 minutes and then stimulated with PDGF (10 ng/mL) for 10 minutes. Total cell lysates were subjected to immunoblot analysis for pSer727-STAT3, pTyr705-STAT3 and total STAT3. Representative blots and compiled densitometric data (pSer/tot STAT3) are depicted.

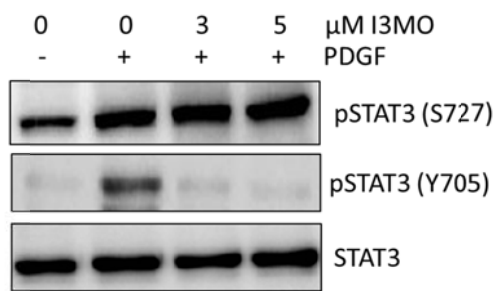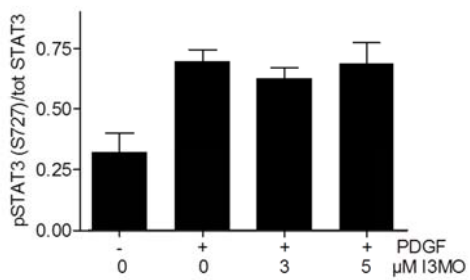

Supplement: NIHMS68940-supplement-Suppl__Figures.pdf [file NIHMS68940-supplement-Suppl__Figures.pdf]
